# Supplementary material for: Hybrid organic–inorganic nanoparticles with associated functionality for catalytic transformation of biomass substrates
Source: Royal Society of Chemistry journal article supplement (doi:10.1039/d3ra01486j), 2023-01-01
Supplement: d3ra01486j1.pdf [file d3ra01486j1.pdf]

Supporting information

**Hybrid organic-inorganic nanoparticles with associated functionality for catalytic transformation of biomass substrates**

*Alicia Coloma,<sup>a</sup> Alexandra Velty\*<sup>a</sup> and Urbano Díaz \*<sup>a</sup>*

*Instituto de Tecnología Química, Universitat Politècnica de València, Consejo Superior de Investigaciones Científicas, 46022 Valencia, Spain; e-mail: [avelty@itq.upv.es](mailto:avelty@itq.upv.es); [udiaz@itq.upv.es](mailto:udiaz@itq.upv.es)*

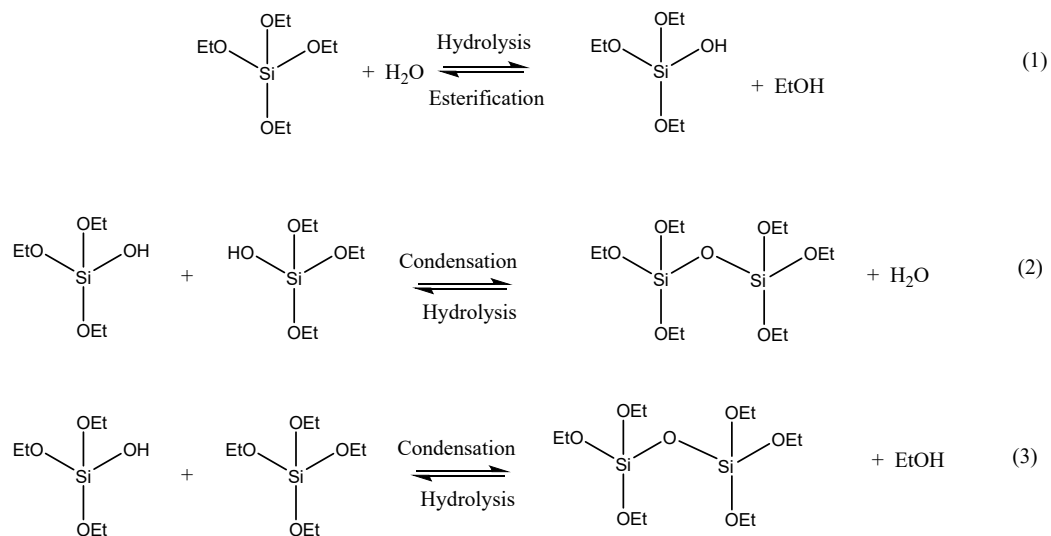

**Scheme S1.** Hydrolysis and condensation reactions during the synthesis process of silica nanoparticles.

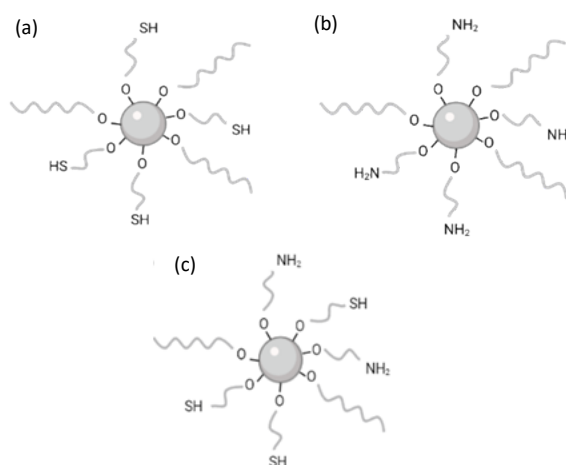

**Scheme S2.** Representation of multi-functional silica nanoparticles: a) NPs-SiO<sub>2</sub>-C<sub>18</sub>-SH, b) NPs-SiO<sub>2</sub>-C<sub>18</sub>-NH<sub>2</sub>, c) Tri-functional material: NPs-SiO<sub>2</sub>-C<sub>18</sub>-SO<sub>3</sub>H-NH<sub>2</sub>.

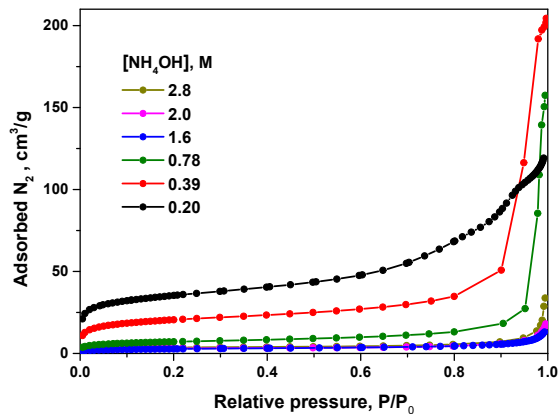

**Figure S1.** N<sub>2</sub> adsorption isotherms of NPs-SiO<sub>2</sub> obtained with different NH<sub>4</sub>OH concentrations.

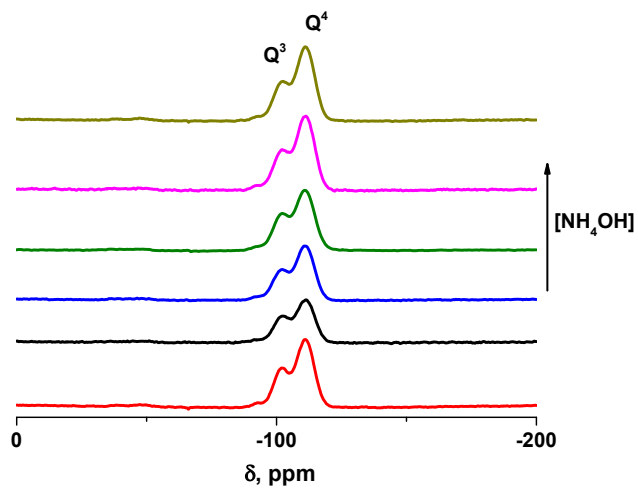

| [NH <sub>4</sub> OH], M | % Q <sup>4</sup> | % Q <sup>3</sup> |
|-------------------------|------------------|------------------|
| 2.8                     | 75               | 25               |
| 2.0                     | 72               | 28               |
| 1.6                     | 71               | 29               |
| 0.78                    | 70               | 30               |
| 0.39                    | 75               | 25               |
| 0.20                    | 73               | 27               |

**Figure S2.** <sup>29</sup>Si BD MAS NMR spectra of NPs-SiO<sub>2</sub> when varying NH<sub>4</sub>OH concentration. Inserted table: percentage of Q<sup>3</sup>-type and Q<sup>4</sup>-type silicon atoms obtained in the different materials obtained with different NH<sub>4</sub>OH concentration.

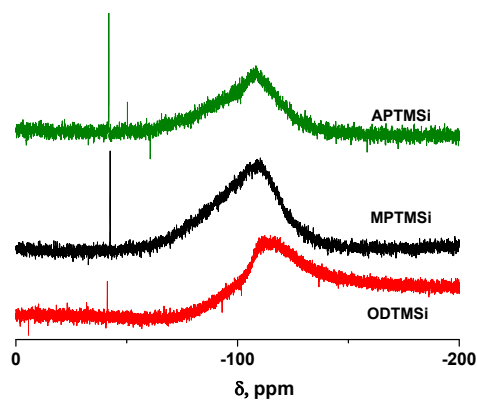

**Figure S3.** Liquid  $^{29}\text{Si}$  NMR spectra of monomeric organosilane precursors.

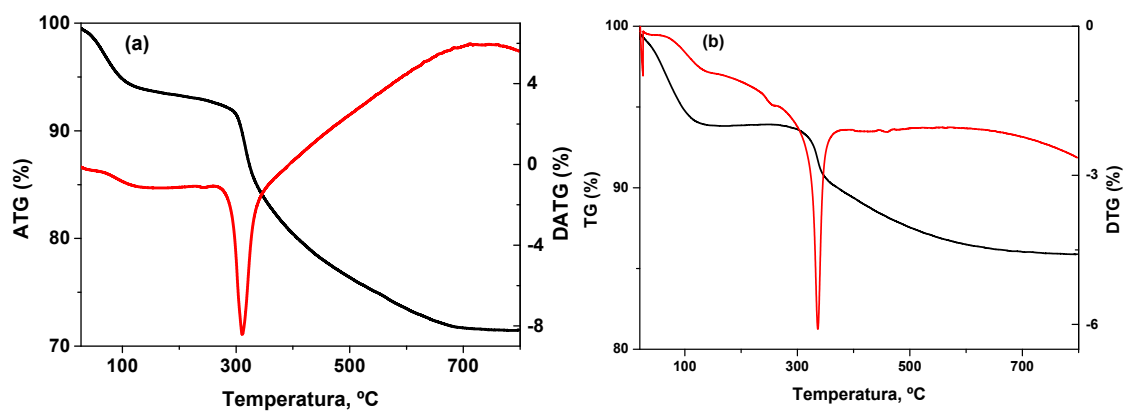

**Figure S4.** Thermogravimetric analysis of a)  $\text{NPs-SiO}_2\text{-C}_{18}\text{-NH}_2$ , b)  $\text{NPs-SiO}_2\text{-C}_{18}\text{-SO}_3\text{H}$  materials.

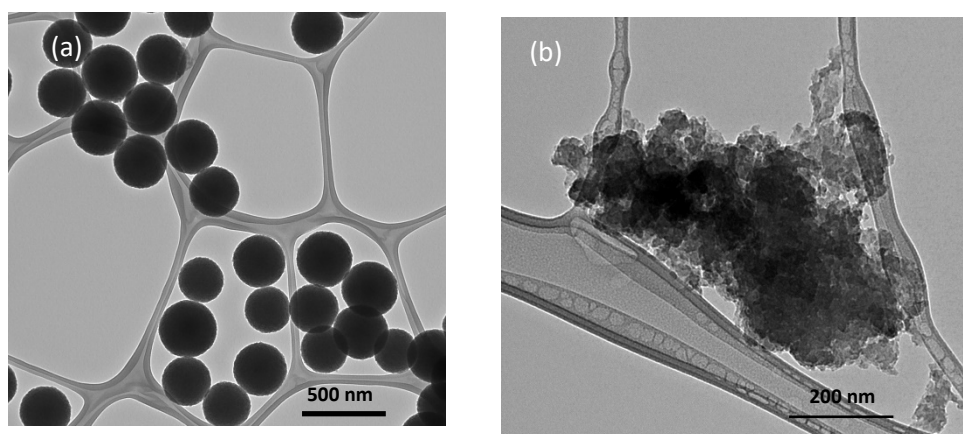

**Figure S5.** TEM images of  $\text{NPs-SiO}_2\text{-C}_{18}\text{-SO}_3\text{H}$ . a)  $[\text{NH}_4\text{OH}] = 1.6 \text{ M}$ , b)  $[\text{NH}_4\text{OH}] = 0.20 \text{ M}$ .

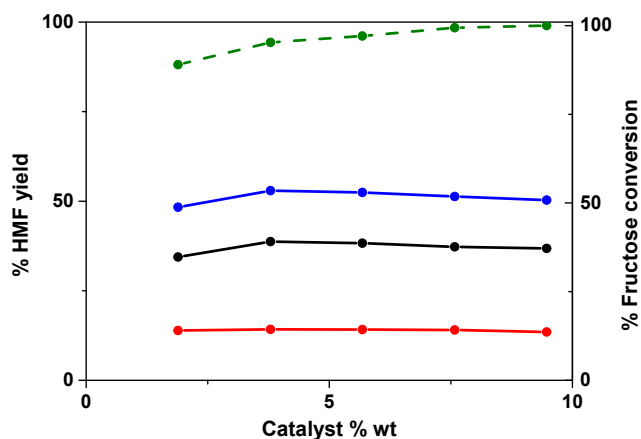

**Figure S6.** Catalytic activity as a function of catalyst amount at 180 °C and 3 min. Yield to HMF (•), fructose conversion (•), HMF<sub>aqueous phase</sub> (•) and HMF<sub>organic phase</sub> (•). Reaction conditions: 300 mg fructose solution (44 wt%), 900 mg MIBK:BuOH 70:30 and 3.8 %wt catalyst NPs-SiO<sub>2</sub>-C<sub>18</sub>-SO<sub>3</sub>H (1:4), particle size of ~30 nm.

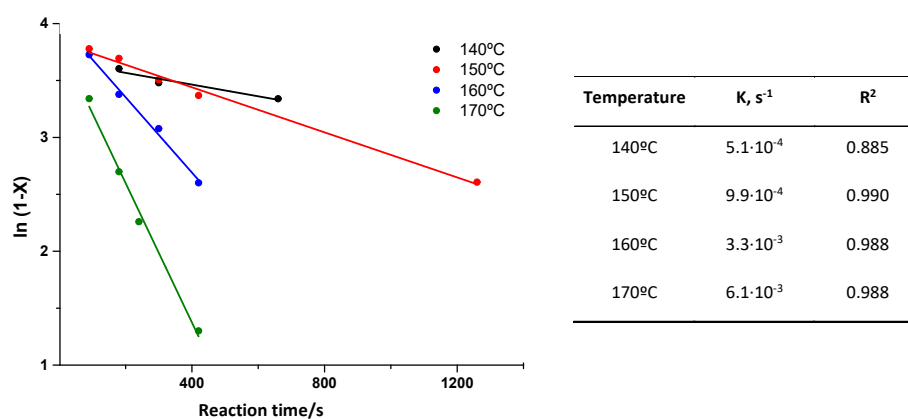

**Figure S7.** Kinetic constants at different temperatures. Reaction conditions: 300 mg fructose solution, 900 mg MIBK:BuOH 70:30 and 3.8 %wt catalyst NPs-SiO<sub>2</sub>-C<sub>18</sub>-SO<sub>3</sub>H 1:4 C<sub>18</sub>/SH molar ratio, particle size of ~30 nm.

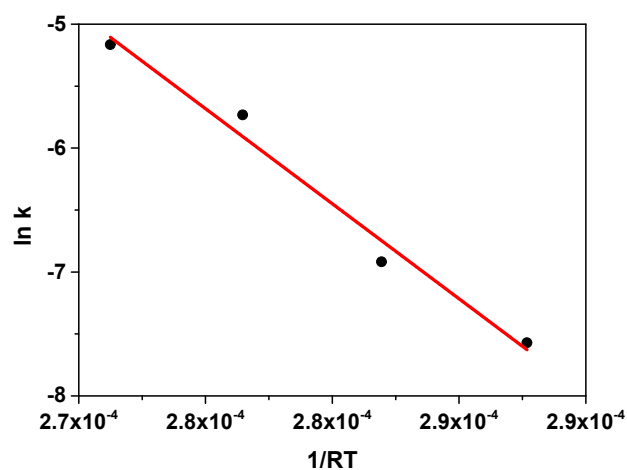

**Figure S8.** Determination Ea: linear fitting according to the Arrhenius equation.

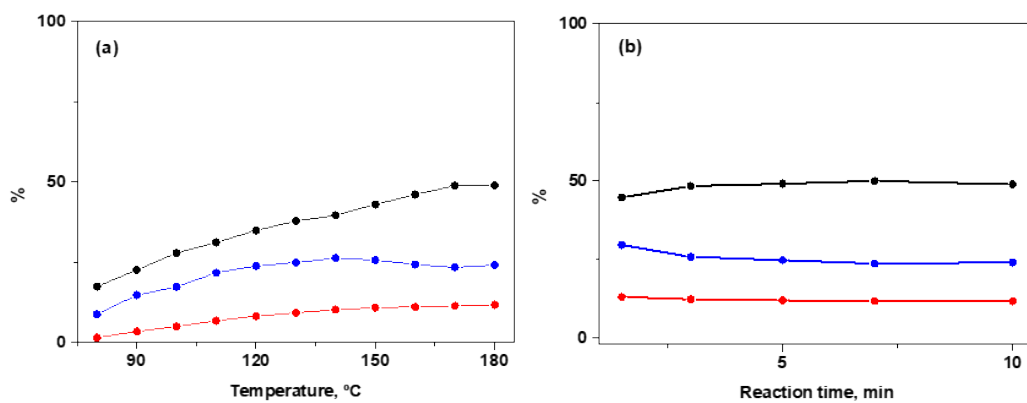

**Figure S9.** Catalytic activity of NPs-SiO<sub>2</sub>-NH<sub>2</sub>, particle size of ~30 nm, for glucose isomerization when varying: a) reaction temperature and b) time. Glucose conversion (●), fructose selectivity (●) and glucose yield (●).

**Table S1.** Textural properties obtained from the nitrogen adsorption isotherms of the NPs-SiO<sub>2</sub>.

| [NH <sub>4</sub> OH],<br>M | Diameter,<br>nm <sup>a</sup> | S <sub>BET</sub> ,<br>m <sup>2</sup> /g | S <sub>Ext</sub> ,<br>mg/g <sup>b</sup> | S <sub>Micro</sub> , cm <sup>3</sup> /g |
|----------------------------|------------------------------|-----------------------------------------|-----------------------------------------|-----------------------------------------|
| 2.8                        | 415 ± 14                     | 12                                      | 9.1                                     | 3.2                                     |
| 2.0                        | 407 ± 16                     | 10                                      | 9.0                                     | 1.4                                     |
| 1.6                        | 421 ± 17                     | 9.5                                     | 7.8                                     | 1.7                                     |
| 0.78                       | 148 ± 9                      | 25                                      | 23                                      | 2.1                                     |
| 0.39                       | 66 ± 6                       | 71                                      | 61                                      | 10                                      |
| 0.20                       | 27 ± 3                       | 120                                     | 99                                      | 21                                      |

<sup>a</sup> Average size of the different silica nanospheres estimated after the measurement of 100 – 130 individual particles from different TEM images. Error was calculated as standard deviation. <sup>b</sup> S<sub>EXT</sub> = S<sub>BET</sub> – S<sub>micro</sub> from t-plot.

**Table S2.** Textural properties obtained from nitrogen adsorption isotherms of mono, bi and tri-functionalized NPs-SiO<sub>2</sub>.

| Entry | Catalyst                                                                 | [NH <sub>4</sub> OH] | S <sub>BET</sub> ,<br>m <sup>2</sup> /g | S <sub>Ext</sub> ,<br>m <sup>2</sup> /g | S <sub>Micro</sub> ,<br>cm <sup>3</sup> /g |
|-------|--------------------------------------------------------------------------|----------------------|-----------------------------------------|-----------------------------------------|--------------------------------------------|
| 1     | NPs-SiO <sub>2</sub> -SO <sub>3</sub> H                                  | 1.6                  | 34.6                                    | 31.9                                    | 2.7                                        |
| 2     | NPs-SiO <sub>2</sub> -C <sub>18</sub>                                    | 1.6                  | 9.46                                    | 9.46                                    | -                                          |
| 3     | NPs-SiO <sub>2</sub> -NH <sub>2</sub>                                    | 1.6                  | 13.0                                    | 12.4                                    | 0.6                                        |
| 4     | NPs-SiO <sub>2</sub> -NH <sub>2</sub>                                    | 0.20                 | 228                                     | 228                                     | -                                          |
| 5     | NPs-SiO <sub>2</sub> -C <sub>18</sub> -SO <sub>3</sub> H                 | 1.6                  | 49.7                                    | 49.1                                    | 0.6                                        |
| 6     | NPSi-SiO <sub>2</sub> -C <sub>18</sub> -SO <sub>3</sub> H                | 0.20                 | 281                                     | 281                                     | -                                          |
| 7     | NPs-SiO <sub>2</sub> -C <sub>18</sub> -NH <sub>2</sub>                   | 1.6                  | 16.3                                    | 16.3                                    | -                                          |
| 8     | NPs-SiO <sub>2</sub> -C <sub>18</sub> -NH <sub>2</sub>                   | 0.20                 | 94.8                                    | 94.8                                    | -                                          |
| 9     | NPs-SiO <sub>2</sub> -C <sub>18</sub> -SO <sub>3</sub> H-NH <sub>2</sub> | 0.20                 | 91.5                                    | 91.5                                    | -                                          |

**Table S3.** Recycling tests for fructose dehydration. Reaction conditions: 180°C, 3 min, 3.8 wt% catalyst. Reaction composition: 300 mg fructose solution, 900 mg MIBK:BuOH 70:30 and catalyst NPs-SiO<sub>2</sub>-C<sub>18</sub>-SO<sub>3</sub>H (1:4), particle size of ~30 nm.

| Cycle | % Yield              |                      | % Yield      | % Fructose conversion |
|-------|----------------------|----------------------|--------------|-----------------------|
|       | HMF<br>Organic phase | HMF<br>Aqueous phase | HMF<br>Total |                       |
| 1     | 45                   | 15                   | 60           | 98                    |
| 2     | 29                   | 13                   | 42           | 81                    |

**Table S4.** Elemental analysis (EA) of fresh and re-used catalyst.

| Cycle | %N | %C   | %H  | %S  |
|-------|----|------|-----|-----|
| 1     | 0  | 13.2 | 3.3 | 3.9 |
| 2     | 0  | 14.0 | 3.1 | 2.7 |

**Table S5.** Fructose dehydration into 5-hydroxymethylfurfural.

| Catalyst                                             | Reaction conditions | Solvent                       | % HMF yield | % Fructose conversion | Ref                    |
|------------------------------------------------------|---------------------|-------------------------------|-------------|-----------------------|------------------------|
| Amberlyst-70                                         | 180°C, 20min        | H <sub>2</sub> O              | 47          | 80                    | 45                     |
| Nb <sub>2</sub> O <sub>5</sub>                       | 165°C, 3h           | H <sub>2</sub> O              | 57          | 76                    | 46                     |
| TiO <sub>2</sub> -SO <sub>3</sub> H                  | 165°C, 3h           | H <sub>2</sub> O/secBuOH/MIBK | 65          | 98                    | 47                     |
| SO <sub>4</sub> <sup>2-</sup> /TiO <sub>2</sub>      | 150°C, 6h           | H <sub>2</sub> O/DMSO         | 75          | 100                   | 48                     |
| PrSO <sub>3</sub> H/GF                               | 120°C, 1h           | DMSO                          | 87          | -                     | 49                     |
| LDMCC                                                | 180°C, 2h           | DMSO                          | 96          | 99                    | 50                     |
| PSSA-AlCl <sub>3</sub>                               | 150°C, 4h           | H <sub>2</sub> O /MIBK/BuOH   | 55          | -                     | 51                     |
| PMO-1a                                               | 160°C, 45 min       | H <sub>2</sub> O /MIBK/BuOH   | 58          | 95                    | 20                     |
| SiO <sub>2</sub> -C <sub>18</sub> -SO <sub>3</sub> H | 180°C, 3 min        | H <sub>2</sub> O /MIBK/BuOH   | 60          | 98                    | This work <sup>a</sup> |

<sup>a</sup> Reaction conditions: 300 mg fructose solution, 900 mg MIBK:BuOH 70:30 and 3.8 wt% catalyst, into a 2 mL microwave vial reactor. The reaction was carried out in a Biotage® Initiator + microwave apparatus.

**Table S6.** Glucose isomerization to fructose.

| Catalyst                          | Reaction conditions | % Fructose yield | % Glucose conversion | Ref                    |
|-----------------------------------|---------------------|------------------|----------------------|------------------------|
| Triethylamine                     | 100°C, 20 min       | 32               | 51                   | 21                     |
| CM-Molten                         | 60°C, 1 h           | 12               | 20                   | 52                     |
| SnMFI-NS                          | 90°C, 12h           | 27               | 31                   | 53                     |
| Bentonite                         | 110°C, 1 h          | 39               | 45                   | 54                     |
| MIL-101(Al)-NH <sub>2</sub>       | 120°C, 2h           | 26               | 44                   | 55                     |
| SiO <sub>2</sub> -NH <sub>2</sub> | 180°C, 3 min        | 12               | 52                   | This work <sup>a</sup> |

<sup>a</sup> Reaction conditions: 5 g of water, 0.5 g of glucose and solid catalyst with 5 mol% N respect to glucose were added into a 5 mL microwave vial reactor. The reaction was carried out in a Biotage® Initiator + microwave apparatus with 2 min pre-stirring.
